# Supplementary material for: Two-dimensional Cu(i)-MOF with mesoporous architecture towards chemiresistive NO2 sensing
Source: Royal Society of Chemistry journal article supplement (doi:10.1039/d4ta07702d), 2025-01-01
Supplement: d4ta07702d1.pdf [file d4ta07702d1.pdf]

## Two-dimensional Cu(I)-MOF with mesoporous architecture towards chemiresistive NO<sub>2</sub> sensing

Dilip Pandey<sup>a</sup>, Trivedi Samarth<sup>a</sup>, Vikash Kumar Verma<sup>b</sup>, Chandrabhan Patel<sup>b</sup>, L Ponvijayakanthan<sup>c</sup>, Neeraj K. Jaiswal<sup>c\*</sup>, Shaibal Mukherjee<sup>b,d,e\*</sup> and Abhinav Raghuvanshi<sup>a\*</sup>

<sup>a</sup>*Department of Chemistry, Indian Institute of Technology Indore, Madhya Pradesh 453552, India.*

<sup>b</sup>*Hybrid Nanodevice Research Group (HNRG), Department of Electrical Engineering, Indian Institute of Technology Indore, Madhya Pradesh 453552, India.*

<sup>c</sup>*2-D Materials Research Laboratory, Discipline of Physics, PDPM Indian Institute of Information Technology Design and Manufacturing, Jabalpur, Madhya Pradesh 482005, India*

<sup>d</sup>*Centre for Advanced Electronics (CAE), Indian Institute of Technology Indore, Madhya Pradesh 453552, India.*

<sup>e</sup>*School of Engineering, RMIT University, Melbourne, VIC 3001, Australia*

**E-mail:** [neeraj@iiitdmj.ac.in](mailto:neeraj@iiitdmj.ac.in), [shaibal@iiti.ac.in](mailto:shaibal@iiti.ac.in), [r.abhinav@iiti.ac.in](mailto:r.abhinav@iiti.ac.in)

### Table of contents

|                                             |    |
|---------------------------------------------|----|
| General Information .....                   | S2 |
| <b>1.1</b> Reagents.....                    | S2 |
| <b>1.2</b> Instruments.....                 | S2 |
| <b>1.3</b> Sensing measurements.....        | S2 |
| <b>2.1</b> Synthesis of PDPA.....           | S3 |
| <b>2.2</b> ATR-IR of PDPA.....              | S4 |
| <b>2.3</b> Mass spectra of PDPA.....        | S4 |
| <b>2.4</b> NMR spectra of PDPA .....        | S5 |
| <b>2.5</b> Synthesis of <b>Cu-MOF</b> ..... | S6 |

|                                                        |     |
|--------------------------------------------------------|-----|
| <b>2.6 ATR-IR of Cu-MOF</b> .....                      | S6  |
| <b>3.1 Structure of Cu-MOF</b> .....                   | S7  |
| <b>3.2 PXRD and TGA of Cu-MOF</b> .....                | S8  |
| <b>3.3 Crystallographic parameters of Cu-MOF</b> ..... | S9  |
| <b>3.4 Surface analysis of Cu-MOF</b> .....            | S10 |
| <b>3.5 Semiconducting Behaviour of Cu-MOF</b> .....    | S11 |
| <b>4.1 Gas sensing by Cu-MOF</b> .....                 | S12 |
| <b>4.2 Comparison of Cu-MOF as a gas sensor</b> .....  | S14 |
| <b>4.3 Theoretical calculations of Cu-MOF</b> .....    | S16 |

## General Information

### 1.1 Reagents

Materials required for the synthesis of DPA were purchased from Avra Chemicals. For ligand synthesis, TLC was used to monitor reaction progress using a Merck 60 F254 precoated silica gel plate (0.25 mm thickness), and the products were judged in a UV chamber. Both  $^1\text{H}$  and  $^{13}\text{C}\{^1\text{H}\}$  NMR spectra were collected using a Bruker 500 MHz spectrometer in DMSO- $d_6$ . Data for proton NMR chemical shifts are shown in ppm downfield from tetramethyl silane and are mentioned in delta ( $\delta$ ) units. The  $^1\text{H}$  NMR splitting patterns are singlet (s), doublet (d), triplet (t), and multiplet (m), and Mestre Nova processed the NMR data. Unless otherwise specified, chemicals were used exactly as received. CuI (>99%) from Loba Chemie Pvt. Ltd., and used without further purification. Solvents like diphenyl ether, acetonitrile (HPLC grade) were bought from Advent Chembio Pvt. Ltd.

### Instruments

Powder X-ray diffraction (PXRD) data were recorded on Rigaku Smart X-ray diffractometer with monochromatic Cu K $\alpha$  (0.1540 nm) radiation in  $2\theta$  range of 5-50 degrees. The attenuated total reflectance infrared spectroscopy (ATR-IR) was performed on Bruker Alpha II spectrophotometer of the powdered sample in the range of 4000-400  $\text{cm}^{-1}$ . We have used a field

emission scanning electron microscope (FE-SEM) on JEOL JSM-7400F for morphological characterization and its elemental mapping. The thermogravimetric analysis was performed on Mettler Toledo TGA 1-star e-system in the temperature range of 30-700 °C.

### Crystallographic details

Single crystal X-ray diffraction studies for **Cu-MOF** were carried out using Agilent technology (Oxford diffraction) super Nova CCD system, with monochromated Mo K $\alpha$  radiation ( $\lambda=0.71073$  Å). Unit cell determination, data collection and reduction, and empirical absorption correction were performed using the CrysAlisPro program. Using Olex2<sup>1</sup>, the structure was solved with the SHELXT<sup>2</sup> structure solution program using Intrinsic phasing and refined with the SHELXL refinement package using Least Squares minimisation.

### Sensing Measurements

5N purity gases such as (NO<sub>2</sub>, NH<sub>3</sub>, H<sub>2</sub>S, SO<sub>2</sub>, and CO<sub>2</sub>) are employed to measure the sensing performance of the fabricated sensor. The flow rate of these gases is precisely controlled by using an advanced mass flow controller (model: Alicat, MC11 slpm, USA). The concentration of these test gases is varied by mixing the synthetic air (99.999 Purity) into the mixing chamber before exposing it on the sensor surface. The resistance change of the sensing layer during test gas exposure is continuously monitored on the Keithley-2612A source meter by applying a constant voltage of +1 V.

### 2.1 Synthesis of *N*-phenyl-*N*-(pyridine-4-yl)pyridine-4-amine (PDPA)

4,4'-Dipyridylamine (DPA) was synthesized following a previous report by Bureš *et al.*<sup>3</sup> For the synthesis of PDPA, in a two-neck r.b., DPA (2000 mg, 11.7 mmol) was added with CuSO<sub>4</sub>(360 mg, 2.2 mmol), 18-crown-6 (120 mg, 0.05 mmol), potassium carbonate (3200mg, 23.4 mmol) with bromobenzene (3.6 mL, 34.8 mmol) in diphenyl ether (15 mL). The reaction temperature was maintained at 450K for two days in N<sub>2</sub>. 2 days later, 200 mL of DCM and 200 mL of MeOH were added to the reaction mixture and passed through the celite pad. Most of the solvent was dried except diphenyl ether. Solvent and other impurities were removed and the compound was purified by column chromatography (Ph<sub>2</sub>O and bromobenzene were removed by hexane as eluent and PDPA was obtained in ethyl acetate as eluent). (Yield:2000 mg, ~70%). <sup>1</sup>H NMR (500 MHz, DMSO-d<sub>6</sub>)  $\delta$  8.41 (s, 4H), 7.50 (t,  $J = 7.7$  Hz, 2H), 7.37 (t,  $J = 7.6$  Hz, 1H), 7.23 (d,  $J = 8.1$  Hz, 2H), 6.95 (d,  $J = 4.7$  Hz, 4H). <sup>13</sup>C{<sup>1</sup>H} NMR (126 MHz,

DMSO-d<sub>6</sub>)  $\delta$  150.99, 150.16, 143.03, 129.92, 127.17, 126.52, 115.52. LCMS (ESI)  $m/z$  calculated for C<sub>16</sub>H<sub>13</sub>N<sub>3</sub> [M+H]<sup>+</sup> 248.1182, found 248.1201.

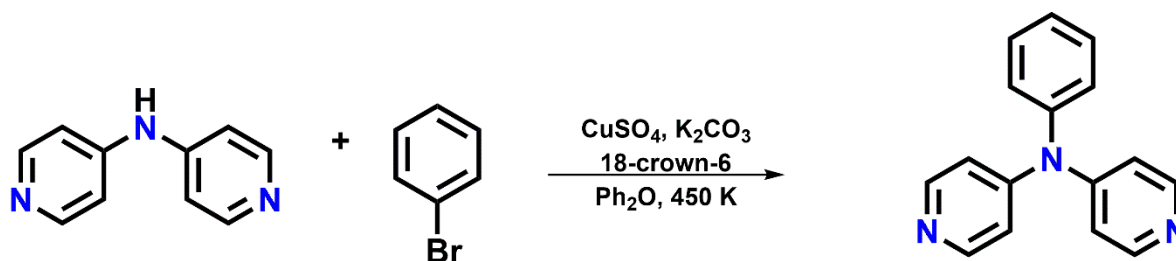

Scheme S1. Synthesis of PDPA

## 2.2 ATR-IR of PDPA

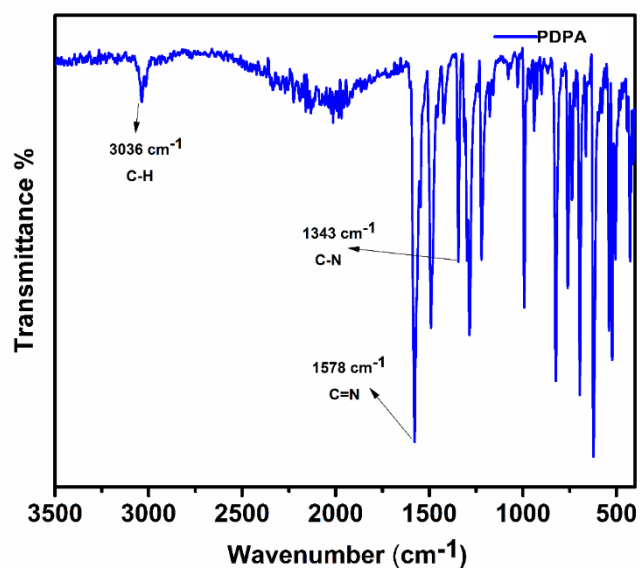

Figure S1. IR spectra of PDPA

## 2.3 Mass spectra of PDPA

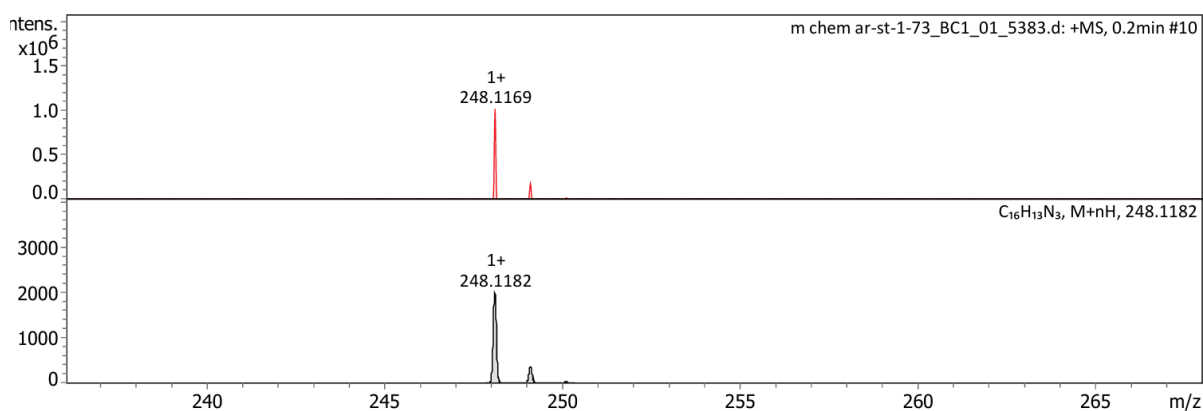

Figure S2. Mass spectra of PDPA

## 2.4 NMR spectra of PDPA

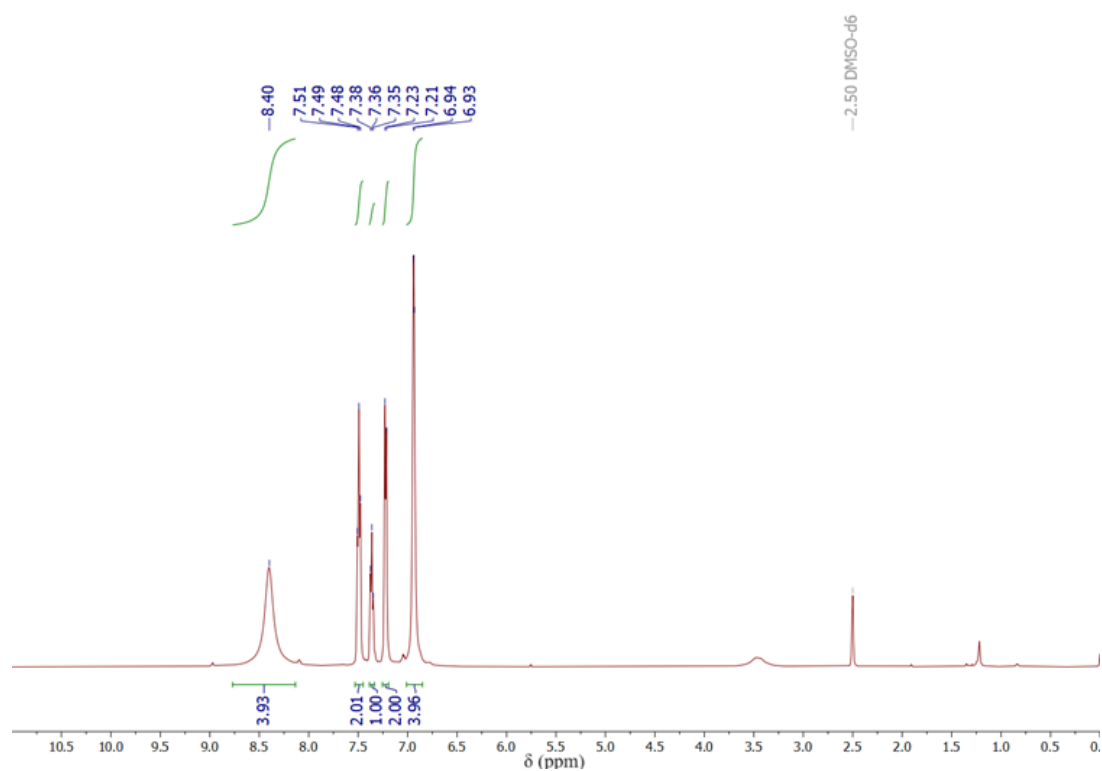

Figure S3.  $^1\text{H}$  NMR of PDPA

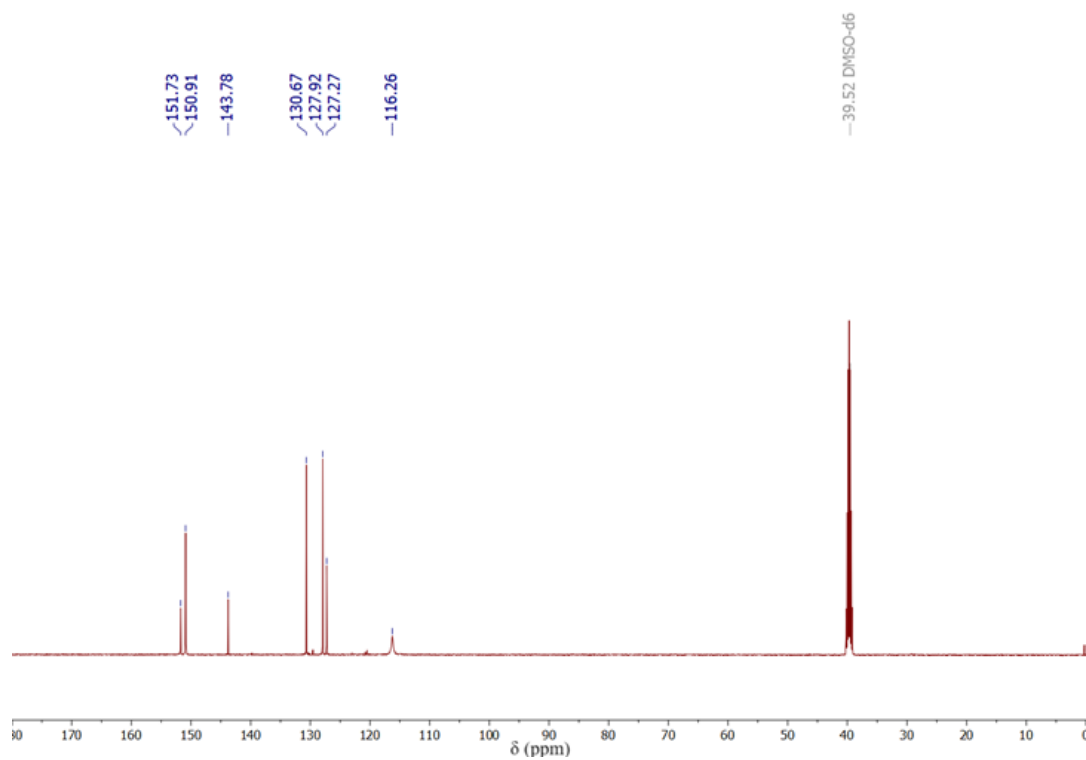

Figure S4.  $^{13}\text{C}\{^1\text{H}\}$  NMR of PDPA

## 2.5 Synthesis of Cu-MOF

Into a 50 mL Schenk tube under N<sub>2</sub> condition, PDPA (100 mg, 0.8 mmol) was dissolved in 2 mL DCM, to which CuI (153 mg, 1.6 mmol) dissolved in 10 mL ACN was added and resulted in instant white precipitates. The reaction mixture was stirred for 12 hours, after which the compound was dried and washed with ACN. (Yield: 200 mg, ~80%). Crystals were obtained by slow diffusion of CuI dissolved in ACN over ligand dissolved in DCM.

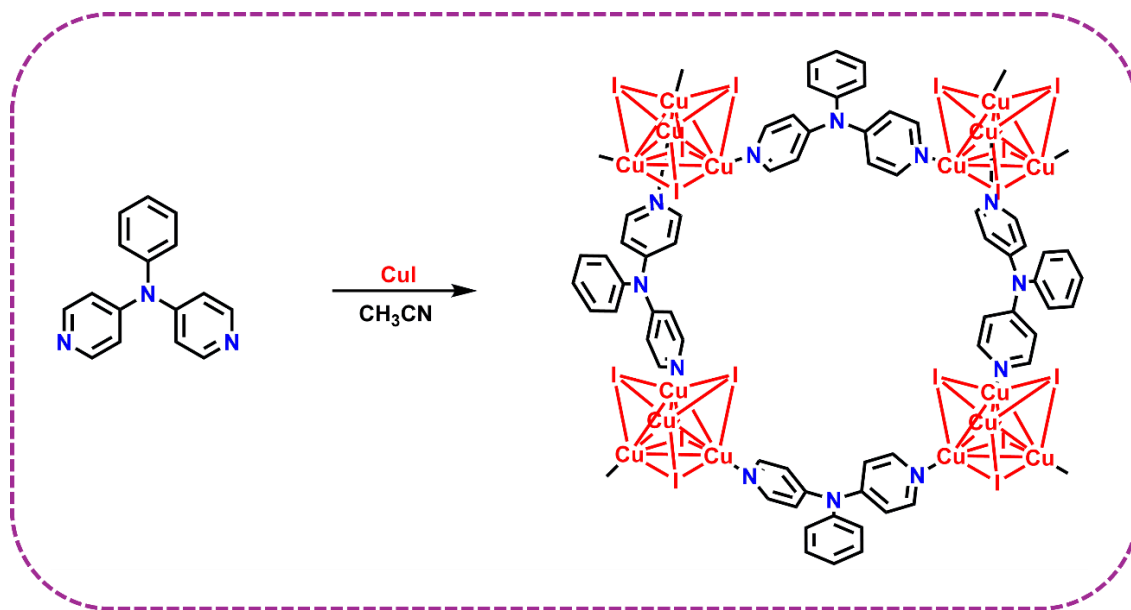

Scheme S2. Synthesis of Cu-MOF

## 2.6 ATR-IR of Cu-MOF

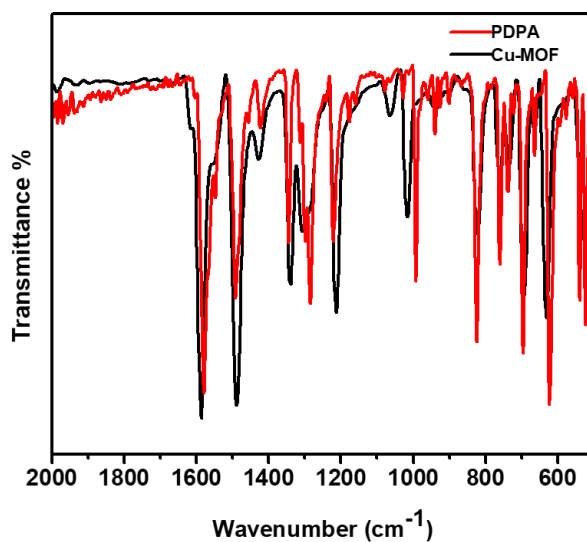

Figure S5. Comparison of IR spectra of PDPA and Cu-MOF

### 3.1 Structure of Cu-MOF

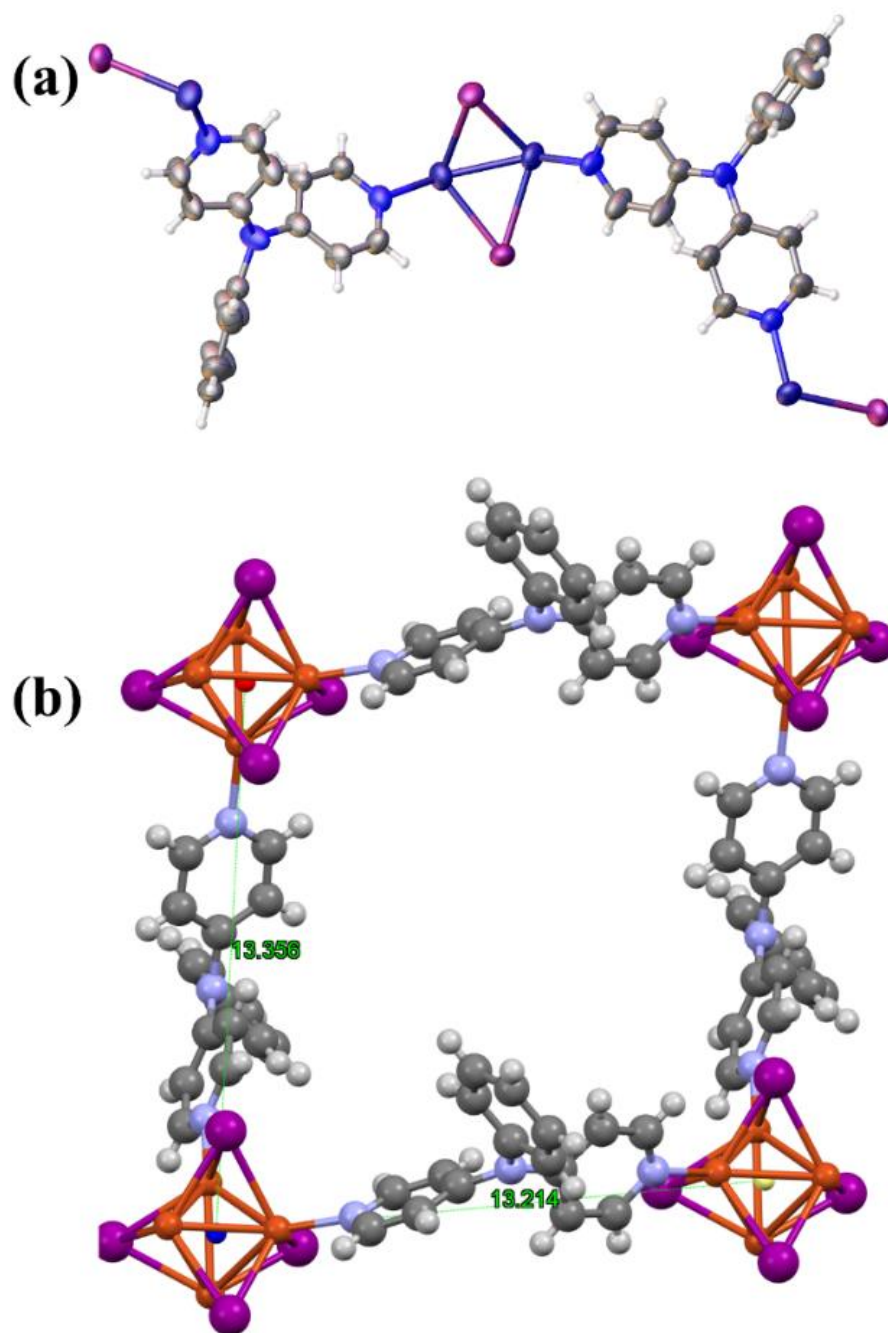

**Figure S6.** (a) The asymmetric unit of **Cu-MOF** (b) different lengths across axes

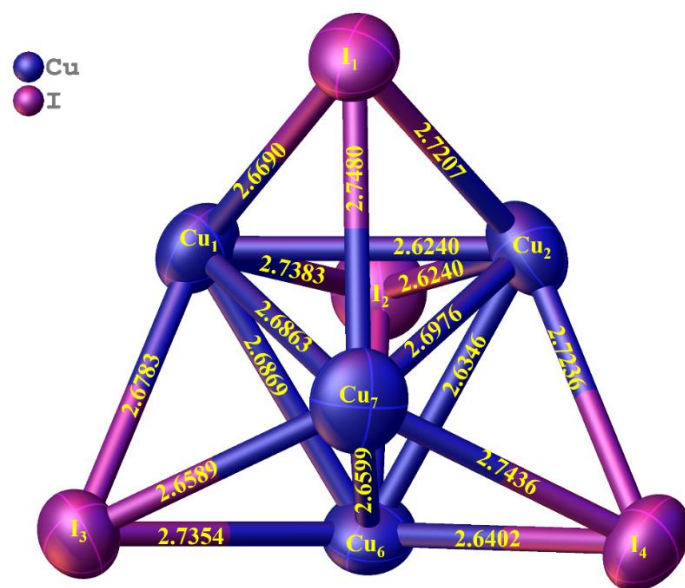

**Figure S7.** Bond lengths of Cu-Cu and Cu-N in Cu<sub>4</sub>I<sub>4</sub> SBU

### 3.2 PXRD and TGA of Cu-MOF

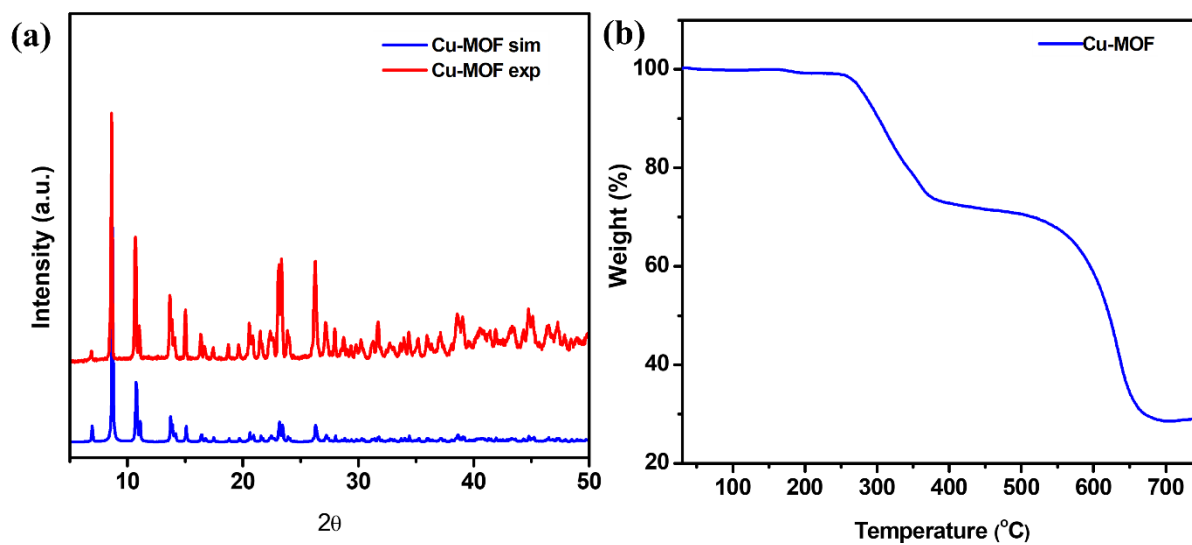

**Figure S8.** (a) PXRD patterns of Simulated and experimental **Cu-MOF** (b) TGA curve of **Cu-MOF**



### 3.3 Crystallographic parameters of Cu-MOF

**Table S1.** Crystallographic table

|                                                      |                                                                                               |
|------------------------------------------------------|-----------------------------------------------------------------------------------------------|
| <b>Compound</b>                                      | <b>Cu-MOF</b>                                                                                 |
| <b>CCDC No.</b>                                      | 2385865                                                                                       |
| <b>Formula</b>                                       | C <sub>35</sub> H <sub>31</sub> Cl <sub>2</sub> Cu <sub>4</sub> I <sub>4</sub> N <sub>7</sub> |
| <b>Formula Weight</b>                                | 1382.33                                                                                       |
| <b>Wavelength</b>                                    | 0.71073 Å                                                                                     |
| <b>Crystal System</b>                                | monoclinic                                                                                    |
| <b>Space group</b>                                   | <i>Cc</i>                                                                                     |
| <b>a/Å</b>                                           | 16.9593(2)                                                                                    |
| <b>b/Å</b>                                           | 20.2694(2)                                                                                    |
| <b>c/Å</b>                                           | 13.3565(2)                                                                                    |
| <b>α/°</b>                                           | 90                                                                                            |
| <b>β/°</b>                                           | 105.5110(10)                                                                                  |
| <b>γ/°</b>                                           | 90                                                                                            |
| <b>V/Å<sup>3</sup></b>                               | 4424.14(10)                                                                                   |
| <b>Z</b>                                             | 4                                                                                             |
| <b>ρ<sub>calcd</sub> (g/cm<sup>3</sup>)</b>          | 2.075                                                                                         |
| <b>Temperature/K</b>                                 | 298.00                                                                                        |
| <b>GOF</b>                                           | 1.034                                                                                         |
| <b>2θ range for data collection</b>                  | 4.006 to 54.814                                                                               |
| <b>Reflections collected</b>                         | 70029                                                                                         |
| <b>Independent reflections</b>                       | 9468 [R <sub>int</sub> = 0.0377,<br>R <sub>sigma</sub> = 0.0283]                              |
| <b>Completeness to<br/>θ=25.242</b>                  | 99.8                                                                                          |
| <b>Final R indices<br/>[I&gt;2σ(I)]</b>              | R <sub>1</sub> = 0.0345, wR <sub>2</sub> =<br>0.0766                                          |
| <b>Final R indices<br/>[all data]</b>                | R <sub>1</sub> = 0.0416, wR <sub>2</sub> =<br>0.0801                                          |
| <b>Largest diff.<br/>peak/hole/ e Å<sup>-3</sup></b> | 0.48/-0.52                                                                                    |

### 3.4 Surface analysis of Cu-MOF

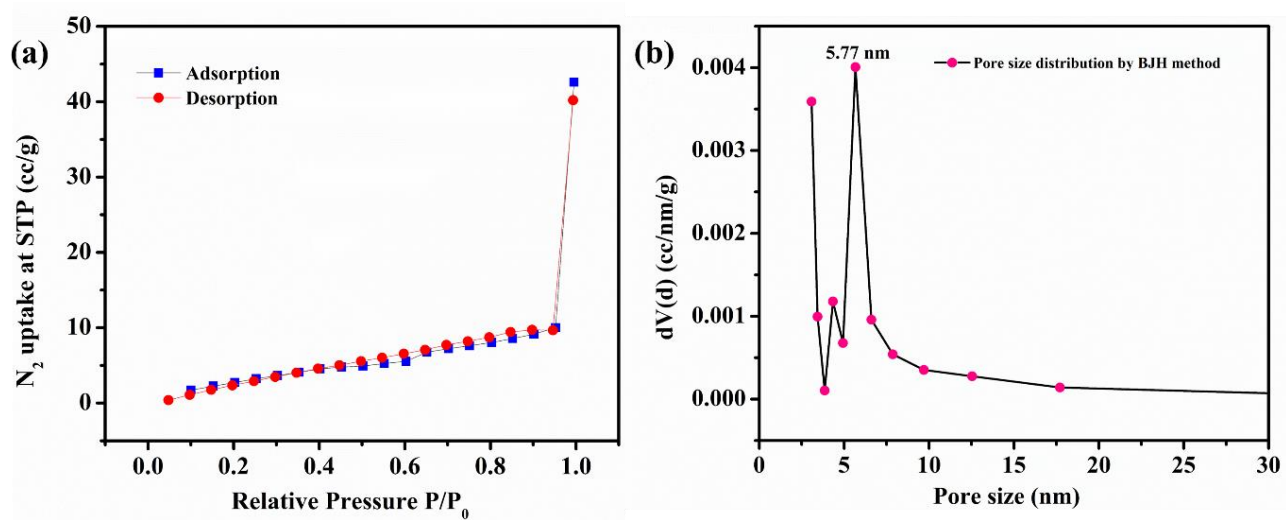

Figure S9. (a) BET (b) BJH of Cu-MOF

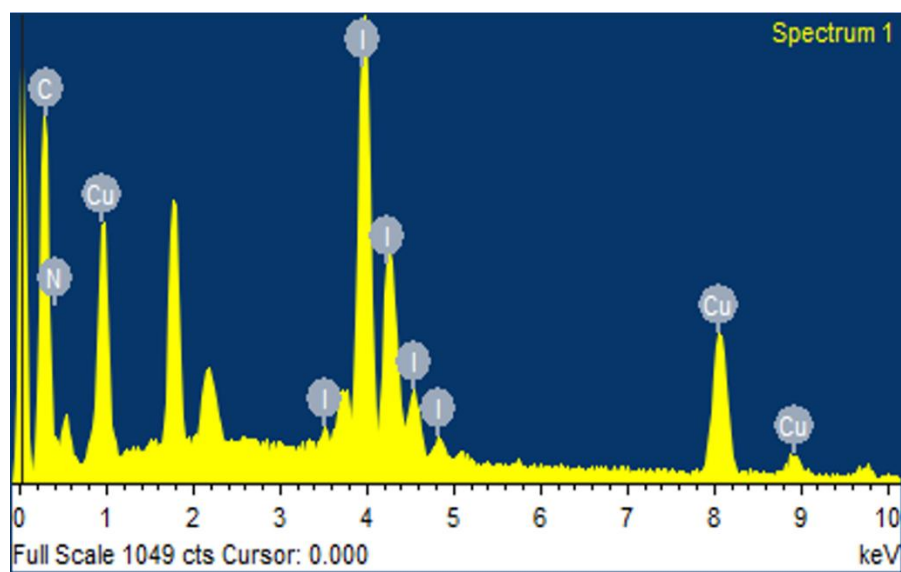

Figure S10. Energy Dispersive X-ray of Cu-MOF

### 3.5 Semiconducting Behaviour of Cu-MOF

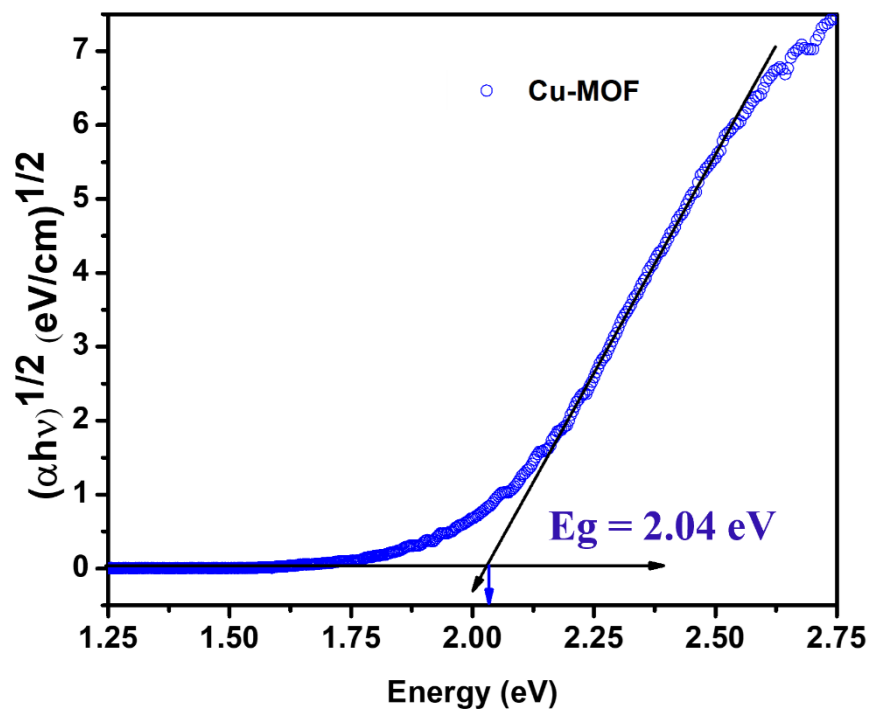

Figure S11. Tauc-Plot of Cu-MOF

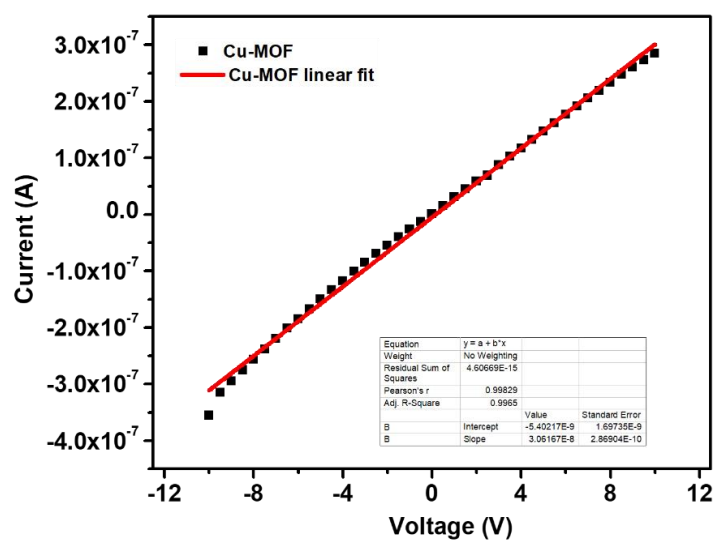

Figure S12. Electrical Conductivity of Cu-MOF

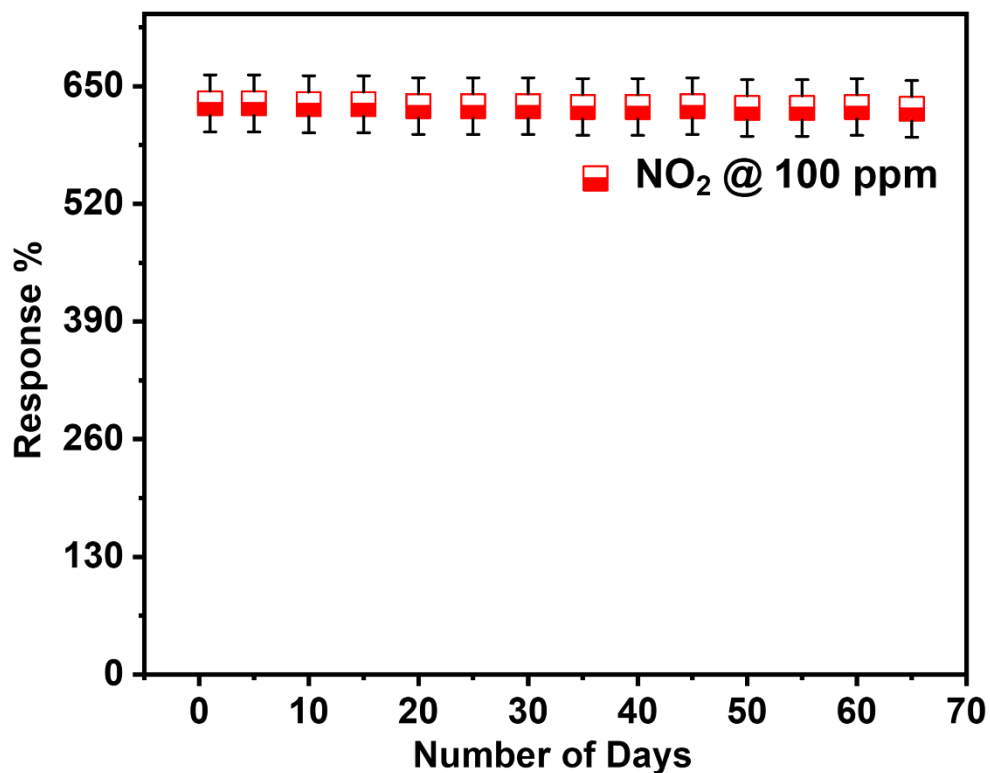

Figure S13. Long-term stability of Cu-MOF-based gas sensor

#### 4.1 Gas sensing behavior of Cu-MOF

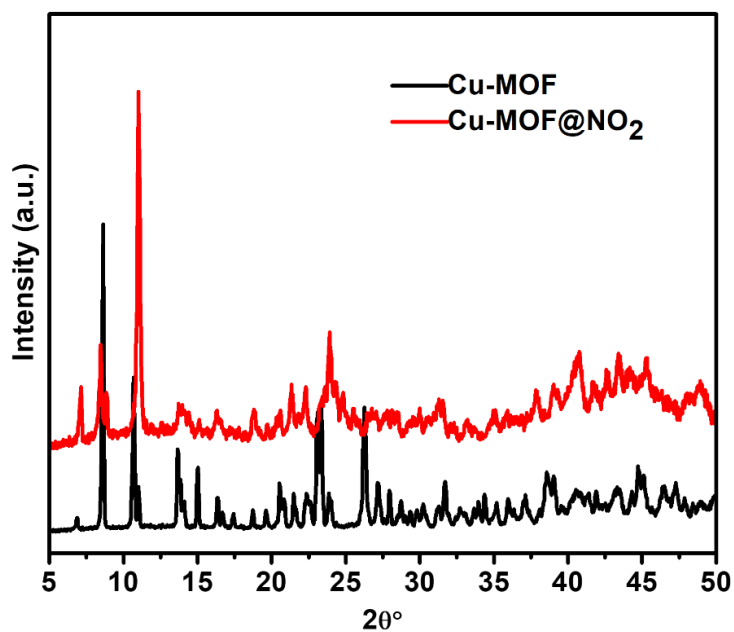

Figure S14. Comparison of PXRD patterns of Cu-MOF before and after exposure to NO<sub>2</sub>

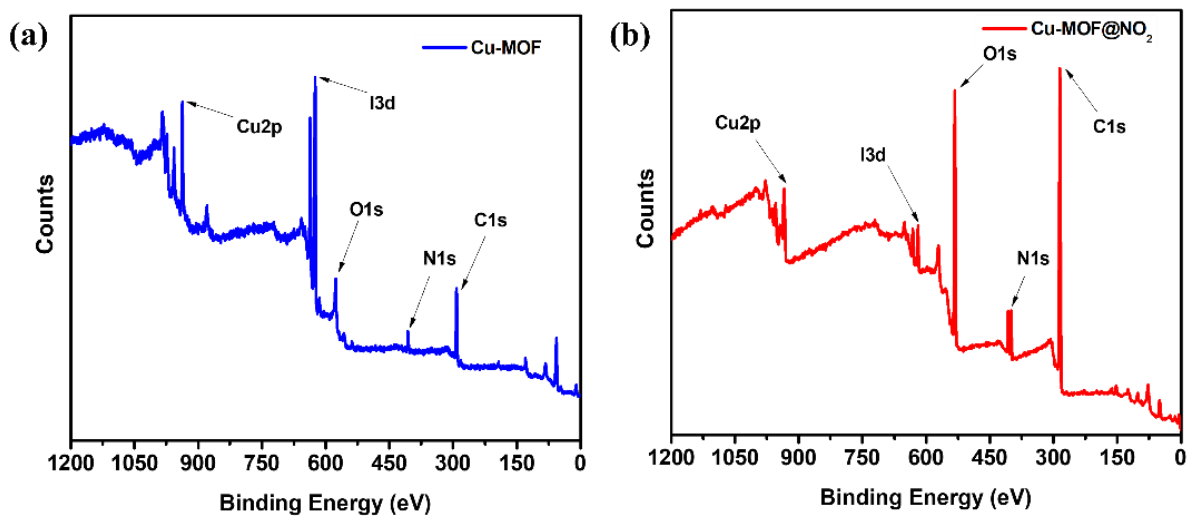

**Figure S15.** (a) XPS survey of **Cu-MOF** (b) XPS survey of **Cu-MOF** after NO<sub>2</sub> exposure.

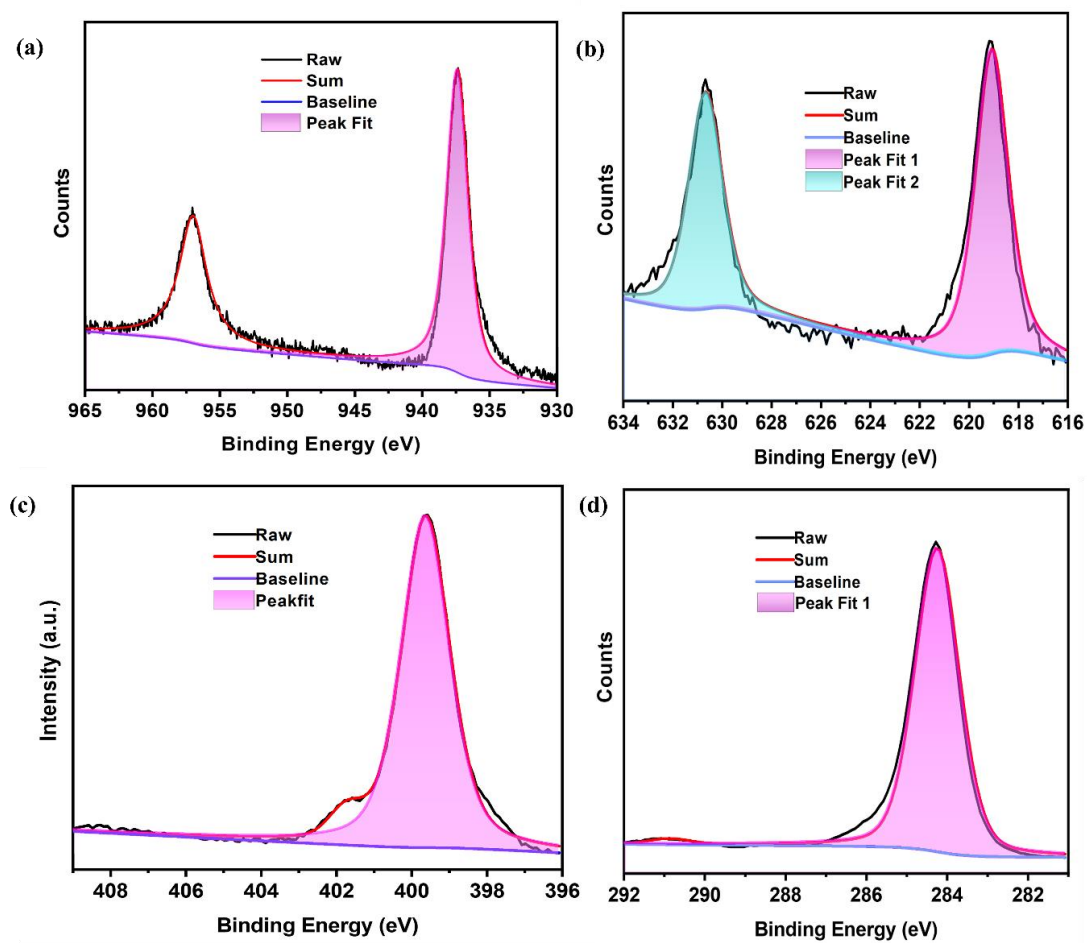

**Figure S16.** High-resolution XPS spectra of **Cu-MOF** (a) Cu2p (b) I3d (c) N1s (d) C1s

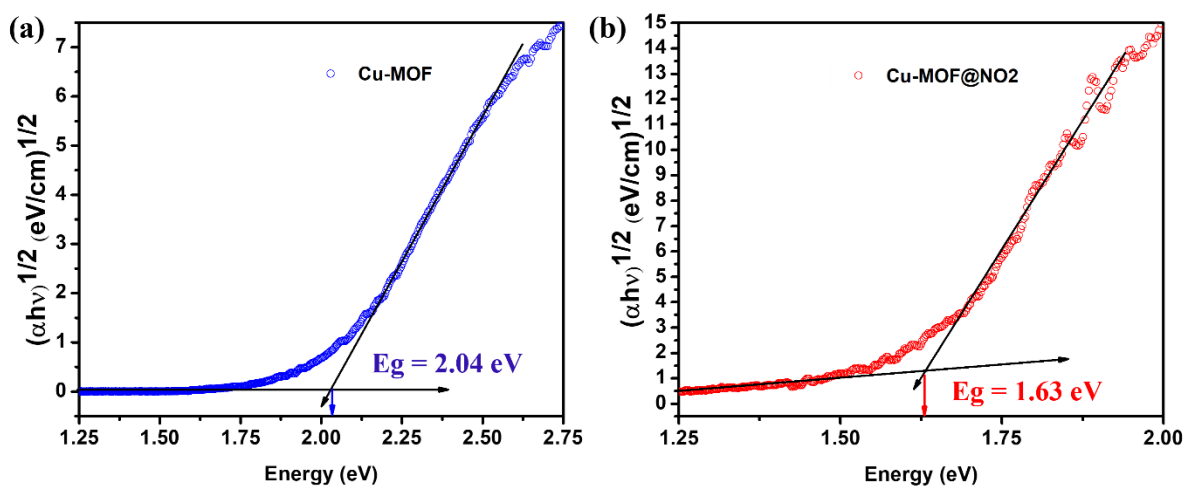

**Figure S17.** Tauc-Plot of Cu-MOF (a) before exposure to NO<sub>2</sub> (b) after exposure to NO<sub>2</sub>

## 4.2 Comparison of Cu-MOF as a gas sensor

**Table S2.** Comparison table for NO<sub>2</sub> gas sensing with MOF-based sensor at room temperature.

| Serial No. | Sensing material                           | Conc. (ppm) | Response /Recovery time (s) | LOD #          | References                                                  |
|------------|--------------------------------------------|-------------|-----------------------------|----------------|-------------------------------------------------------------|
| 1.         | Cu-Salphen-MOF                             | 10          | 135/412.2                   | 0.28 ppm       | <i>Angew. Chem. Int. Ed.</i> , 2023, <b>62</b> , e202302645 |
| 2.         | Cu <sub>3</sub> (HHTP) <sub>2</sub>        | 1           | 1080/--                     | --             | <i>Adv. Sci.</i> , 2019, <b>6</b> , 1900250                 |
| 3.         | HIOTP-Ni                                   | 10          | 101.4/619.2                 | 0.21 ppm       | <i>Angew. Chem.</i> , 2023, <b>135</b> , e202306224         |
| 4.         | Zn <sub>3</sub> (HHTQ) <sub>2</sub>        | 3           | 132/594                     | 0.269 ppm      | <i>Angew. Chem. Int. Ed.</i> , 2024, <b>35</b> , e202408189 |
| 5.         | CuI-K-INA                                  | 10          | 121.8/312.6                 | 14.12 ppb      | <i>J. Am. Chem. Soc.</i> , 2023, <b>145</b> , 19293–19302   |
| 6.         | Cu <sub>3</sub> (HHTP) <sub>2</sub> powder | 3           | 1038/--                     | 1 ppm          | <i>Nat. Commun.</i> , 2021, <b>12</b> , 4294                |
| 7.         | PCN-222-Cu                                 | 0.02        | 67/261                      | 0.93 ppb       | <i>ACS Sens.</i> , 2023, <b>8</b> , 4353–4363               |
| 8.         | PCN-222-Ni                                 | 0.15        | 82/159                      | 5.98 ppb       | <i>ACS Sens.</i> , 2023, <b>8</b> , 4353–4363               |
| 9.         | Cu(I) CP                                   | 10          | 15.5/21                     | 1.3 ppb        | <i>Small</i> , 2025, 2409553                                |
| <b>10.</b> | <b>Cu-MOF</b>                              | <b>10</b>   | <b>11.6/13</b>              | <b>3.5 ppb</b> | <b>This Work</b>                                            |

**Table S3.** Comparison table for NO<sub>2</sub> gas sensing with hybrid MOF-based sensor at room temperature.

| Serial No. | Sensing material                                                    | Conc. (ppm) | Response /Recovery time (s) | LOD <sup>#</sup> | References                                                         |
|------------|---------------------------------------------------------------------|-------------|-----------------------------|------------------|--------------------------------------------------------------------|
| 1.         | Ni <sub>3</sub> (HHTP) <sub>2</sub> /polyimide (PI), tape (PET)     | 0.2         | --/30                       | 56 ppb           | <i>ACS Sens.</i> , 2024, <b>9</b> , 1916–1926                      |
| 2.         | Au/ZIF-8-film                                                       | 10          | 7.2/> 600                   | 0.19 ppm         | <i>ACS Appl. Mater. Interfaces</i> , 2019, <b>11</b> , 13624–13631 |
| 3.         | Cu <sub>3</sub> (HHTP) <sub>2</sub> -NFs                            | 5           | ~ 600/~ 600                 | --               | <i>ACS Cent. Sci.</i> , 2021, <b>7</b> , 1176–1182                 |
| 4.         | Cu <sub>3</sub> (HHTP) <sub>2</sub> /Fe <sub>2</sub> O <sub>3</sub> | 5           | ~ 600/~ 600                 | 11 ppb           | <i>ACS Cent. Sci.</i> , 2021, <b>7</b> , 1176–1182                 |
| 5.         | Cu <sub>3</sub> (HHTP) <sub>2</sub> Thin film                       | 3           | 840/--                      | 1 ppm            | <i>Nat. Commun.</i> , 2021, <b>12</b> , 4294                       |
| 6.         | MIL-101(Cr)⊃ PEDOT                                                  | 10          | 150/Irr.                    | 0.06 ppm         | <i>J. Am. Chem. Soc.</i> <i>138</i> , 10088–10091                  |
| 7.         | LIG@Cu <sub>3</sub> (HHTP) <sub>2</sub>                             | 0.01        | 16/15                       | 0.168 ppb        | <i>Nat. Commun.</i> , 2023, <b>14</b> , 3114                       |
| 8.         | Pd@Cu <sub>3</sub> (HHTP) <sub>2</sub>                              | 5           | 828/--                      | 1ppm             | <i>Adv. Sci.</i> , 2019, <b>6</b> , 1900250                        |
| 9.         | Thin film Pt@Cu <sub>3</sub> (HHTP) <sub>2</sub>                    | 3           | 492/--                      | 0.1 ppm          | <i>Nat. Commun.</i> , 2021, <b>12</b> , 4294                       |
| <b>10.</b> | <b>Cu-MOF</b>                                                       | <b>10</b>   | <b>11.6/13</b>              | <b>3.5 ppb</b>   | <b>This Work</b>                                                   |

#:- LOD values are determined by  $(3*SD/\sigma)$  where, SD represents the deviation of sensor response values obtained in the presence of air, while  $\sigma$  represents the slope of the linear portion of the calibrated curve.



### 4.3 Theoretical calculations of Cu-MOF

**Table S4.** The calculated Mulliken charges (in e) before and after adsorption on NO<sub>2</sub> molecule and Cu-I complex of Cu-MOF

|                                    | Atom | Before adsorption | After Adsorption |
|------------------------------------|------|-------------------|------------------|
| <b>Cu-MOF</b>                      | Cu1  | 18.744            | 18.582           |
|                                    | Cu2  | 18.750            | 18.682           |
|                                    | Cu3  | 18.739            | 18.694           |
|                                    | Cu4  | 18.750            | 18.758           |
|                                    | I1   | 7.317             | 7.280            |
|                                    | I2   | 7.338             | 7.332            |
|                                    | I3   | 7.336             | 7.291            |
|                                    | I4   | 7.310             | 7.283            |
| Adsorbate NO <sub>2</sub> molecule | N    | 4.897             | 5.002            |
|                                    | O    | 6.050             | 6.231            |
|                                    | O    | 6.053             | 6.225            |
|                                    |      |                   |                  |

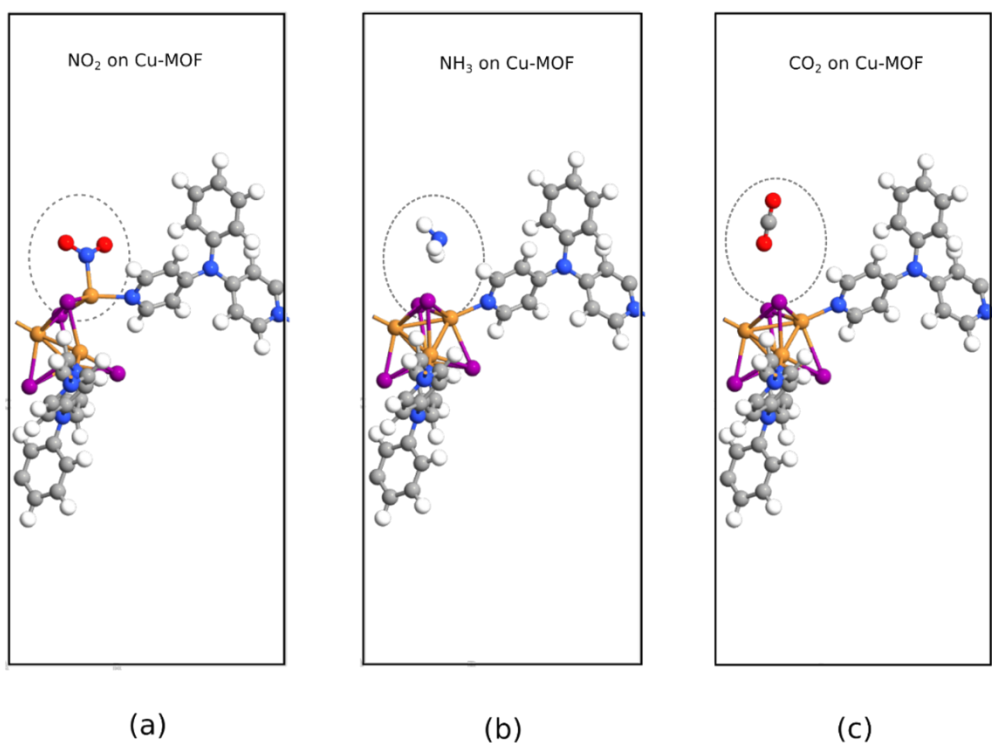

**Figure S18.** Interaction of **Cu-MOF** with (a)  $\text{NO}_2$  (b)  $\text{NH}_3$  (c)  $\text{CO}_2$

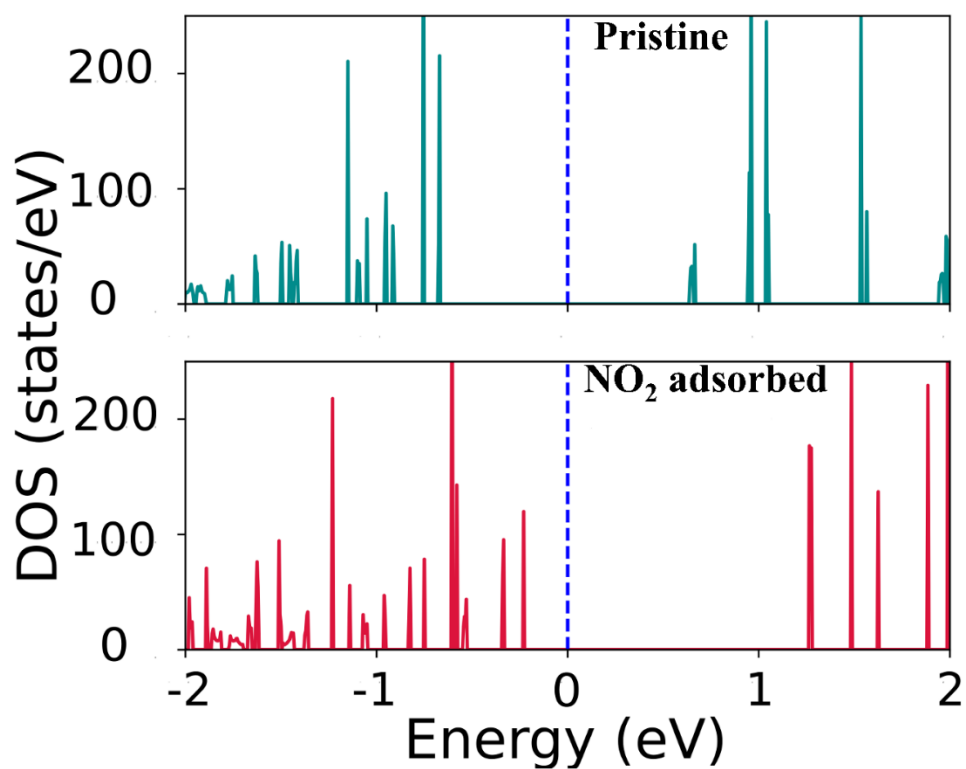

**Figure S19.** DOS of pristine and adsorbed  $\text{NO}_2$  on **Cu-MOF**

## References:

- 1 O. V. Dolomanov, L. J. Bourhis, R. J. Gildea, J. A. K. Howard and H. Puschmann, *J Appl Crystallogr*, 2009, **42**, 339–341.
- 2 G. M. Sheldrick and T. R. Schneider, in *Methods in Enzymology*, Elsevier, 1997, vol. 277, pp. 319–343.
- 3 F. Bureš, D. Cvejn, K. Melánová, L. Beneš, J. Svoboda, V. Zima, O. Pytela, T. Mikysek, Z. Růžičková, I. V. Kityk, A. Wojciechowski and N. AlZayed, *J. Mater. Chem. C*, 2016, **4**, 468–478.
- 4 X. Su, Z. Zhong, X. Yan, T. Zhang, C. Wang, Y.-X. Wang, G. Xu and L. Chen, *Angewandte Chemie International Edition*, 2023, **62**, e202302645.
- 5 Y.-M. Jo, K. Lim, J. W. Yoon, Y. K. Jo, Y. K. Moon, H. W. Jang and J.-H. Lee, *ACS Cent. Sci.*, 2021, **7**, 1176–1182.
- 6 B. Le Ouay, M. Boudot, T. Kitao, T. Yanagida, S. Kitagawa and T. Uemura, *J. Am. Chem. Soc.*, 2016, **138**, 10088–10091.
